# Supplementary material for: Viscosity of erythritol and erythritol–water particles as a function of water activity: new results and an intercomparison of techniques for measuring the viscosity of particles
Source: Copernicus journal article supplement (doi:10.5194/amt-11-4809-2018), 2018-08-17
Supplement: Supplementary file 1 [file amt-11-4809-2018-supplement.pdf]

Supplement of Atmos. Meas. Tech., 11, 4809–4822, 2018  
<https://doi.org/10.5194/amt-11-4809-2018-supplement>  
© Author(s) 2018. This work is distributed under  
the Creative Commons Attribution 4.0 License.

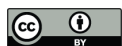

*Supplement of*

## **Viscosity of erythritol and erythritol–water particles as a function of water activity: new results and an intercomparison of techniques for measuring the viscosity of particles**

**Yangxi Chu et al.**

*Correspondence to:* Allan K. Bertram ([bertram@chem.ubc.ca](mailto:bertram@chem.ubc.ca))

The copyright of individual parts of the supplement might differ from the CC BY 4.0 License.

### **S1. Calculation of conditioning times for droplets**

To determine the time needed for conditioning droplets to a known water activity ( $a_w$ ), we first estimated the characteristic time for the diffusion of water molecules within erythritol-water droplets ( $\tau_w$ ) using the following equation (Seinfeld and Pandis, 2006; Shiraiwa et al., 2011):

$$\tau_w = r_p^2 / (\pi^2 D_w), \quad (\text{S1})$$

where  $r_p$  is the droplet radius and  $D_w$  is the diffusion coefficient of water within the droplet.  $\tau_w$  in Eq. (S1) is the time when the concentration of water at the droplet center deviates by less than a factor of  $1/e$  from the equilibrated value. To estimate  $D_w$ , we first estimated the upper limit of the viscosity of erythritol droplets using Table SI.22 in Song et al. (2016). Next, we calculated the  $a_w$  value that a sucrose-water particle of the same viscosity would have, using Table S2 in Marshall et al. (2016). Finally, we converted the  $a_w$  to  $D_w$  in sucrose-water particles using Table 1 and Eq. (4) in Price et al. (2014). This procedure assumes that the  $D_w$  values are identical for erythritol-water and sucrose-water particles having the same viscosity, because  $D_w$  values in erythritol-water particles are not available in the literature.

In our experiments, a duration of at least  $6.5 \tau_w$  was allowed for conditioning to a certain  $a_w$  (Table S1). Section 3.1 in the main text shows that this duration is sufficient for particles to equilibrate with the corresponding relative humidity in the surrounding gas phase.

### **S2. Fluorescence intensity as a function of RBID mass fraction in conditioned thin films**

Prior to rFRAP experiments, we measured the average fluorescence intensity as a function of RBID concentration in sample films with  $a_w = 0.630 \pm 0.025$ . The fluorescence intensity was averaged over an area of approximately  $30 \times 30 \mu\text{m}^2$ . The laser scanning microscope settings used were identical to those in Sect. 2.1.2 in the main text. Figure S2 shows the average fluorescence intensity as a function of the mass fraction of RBID in sample films. The average fluorescence intensity was linearly proportional to the mass fraction of RBID in sample films in the range of 0–2 weight percent. Our rFRAP experiments were performed using RBID concentrations within this range.

## Tables

**Table S1.** Experimental parameters used when conditioning the erythritol-water droplets to a known water activity ( $a_w$ ) prior to the rFRAP experiments.

| $a_w$             | Droplet radius ( $\mu\text{m}$ ) | $\tau_w$ at $a_w$ lower limit <sup>a</sup> | Actual conditioning time |
|-------------------|----------------------------------|--------------------------------------------|--------------------------|
| $0.019 \pm 0.019$ | 100                              | 3.3 h                                      | 80 h                     |
| $0.023 \pm 0.023$ | 100                              | 3.3 h                                      | 24 h                     |
| $0.047 \pm 0.047$ | 100                              | 3.3 h                                      | 21.5 h                   |
| $0.053 \pm 0.053$ | 100                              | 3.3 h                                      | 48 h                     |
| $0.050 \pm 0.050$ | 100                              | 3.3 h                                      | 72 h                     |
| $0.048 \pm 0.048$ | 100                              | 3.3 h                                      | 96 h                     |
| $0.153 \pm 0.025$ | 185                              | 3.6 h                                      | 65 h                     |
| $0.261 \pm 0.025$ | 150                              | 1.7 h                                      | 48 h                     |
| $0.514 \pm 0.025$ | 170                              | 0.41 h                                     | 68 h                     |

<sup>a</sup> $\tau_w$  is the calculated characteristic time for water molecules to diffuse within erythritol-water droplets of specified radii at the lower limit of  $a_w$ , corresponding to the upper limit of droplet viscosity.

**Table S2.** Results from rFRAP experiments.

| $a_w$             | RBID diffusion coefficients<br>( $\text{m}^2 \text{s}^{-1}$ ) <sup>a</sup> |                        |                        | Viscosity of erythritol-water particles<br>(Pa s) |             |             |
|-------------------|----------------------------------------------------------------------------|------------------------|------------------------|---------------------------------------------------|-------------|-------------|
|                   | Mean                                                                       | Upper limit            | Lower limit            | Mean                                              | Upper limit | Lower limit |
| $0.019 \pm 0.019$ | $1.19 \times 10^{-15}$                                                     | $1.63 \times 10^{-15}$ | $8.67 \times 10^{-16}$ | 30.7                                              | 42.1        | 22.4        |
| $0.023 \pm 0.023$ | $3.35 \times 10^{-15}$                                                     | $4.17 \times 10^{-15}$ | $2.69 \times 10^{-15}$ | 10.9                                              | 13.5        | 8.75        |
| $0.047 \pm 0.047$ | $1.47 \times 10^{-15}$                                                     | $3.43 \times 10^{-15}$ | $6.29 \times 10^{-16}$ | 24.7                                              | 57.7        | 10.6        |
| $0.053 \pm 0.053$ | $2.76 \times 10^{-15}$                                                     | $4.81 \times 10^{-15}$ | $1.58 \times 10^{-15}$ | 13.2                                              | 22.9        | 7.54        |
| $0.050 \pm 0.050$ | $2.36 \times 10^{-15}$                                                     | $4.12 \times 10^{-15}$ | $1.35 \times 10^{-15}$ | 15.4                                              | 26.9        | 8.80        |
| $0.048 \pm 0.048$ | $6.36 \times 10^{-15}$                                                     | $1.00 \times 10^{-14}$ | $4.05 \times 10^{-15}$ | 5.71                                              | 8.97        | 3.63        |
| $0.153 \pm 0.025$ | $5.02 \times 10^{-15}$                                                     | $7.73 \times 10^{-15}$ | $3.25 \times 10^{-15}$ | 7.26                                              | 11.2        | 4.71        |
| $0.261 \pm 0.025$ | $1.67 \times 10^{-14}$                                                     | $2.21 \times 10^{-14}$ | $1.27 \times 10^{-14}$ | 2.18                                              | 2.88        | 1.65        |
| $0.514 \pm 0.025$ | $2.86 \times 10^{-13}$                                                     | $3.52 \times 10^{-13}$ | $2.33 \times 10^{-13}$ | 0.127                                             | 0.157       | 0.104       |

<sup>a</sup>The reported RBID diffusion coefficients are the result of a minimum of four repeated measurements on separate thin films.

**Table S3.** Viscosity of erythritol at  $a_w < 0.1$  measured using the optical tweezers technique in this study.

| $a_w$             | $\log_{10}$ (viscosity / Pa s) | Viscosity (Pa s) of erythritol-water particles |                    |                    | Method              |
|-------------------|--------------------------------|------------------------------------------------|--------------------|--------------------|---------------------|
|                   |                                | Mean                                           | Upper limit        | Lower limit        |                     |
| $0.040 \pm 0.020$ | $3.04 \pm 0.92$                | $1.10 \times 10^3$                             | $9.12 \times 10^3$ | $1.32 \times 10^2$ | Brightfield imaging |
| $0.085 \pm 0.020$ | $2.32 \pm 1.68$                | $2.09 \times 10^2$                             | $1.00 \times 10^4$ | $4.37 \times 10^0$ | Brightfield imaging |

**Table S4. Literature viscosity data included in Fig. 10 in the main text.**

| Class   | Compound          | Viscosity (Pa s)                                                            | Reference                   |
|---------|-------------------|-----------------------------------------------------------------------------|-----------------------------|
| Alkane  | n-butane          | $1.8 \times 10^{-4}$ <sup>a</sup>                                           | Rothfuss and Petters (2017) |
| Alcohol | 1-butanol         | $2.9 \times 10^{-3}$ <sup>a</sup>                                           | Rothfuss and Petters (2017) |
|         | 2-butanol         | $3.7 \times 10^{-3}$ <sup>a</sup>                                           | Rothfuss and Petters (2017) |
| Diol    | 1,2-butanediol    | $6.6 \times 10^{-2}$ <sup>a</sup>                                           | Rothfuss and Petters (2017) |
|         | 1,4-butanediol    | $9.1 \times 10^{-2}$ <sup>a</sup>                                           | Rothfuss and Petters (2017) |
|         | 2,3-butanediol    | $1.3 \times 10^{-1}$ <sup>a</sup>                                           | Rothfuss and Petters (2017) |
| Triol   | 1,2,3-butanetriol | $1.6 \times 10^0$ ( $1.5 \times 10^0$ –<br>$1.7 \times 10^0$ ) <sup>b</sup> | Grayson et al. (2017)       |
|         | 1,2,4-butanetriol | $1.8 \times 10^0$ ( $1.0 \times 10^0$ –<br>$3.1 \times 10^0$ ) <sup>a</sup> | Song et al. (2016)          |

<sup>a</sup>Viscosity data at 293 K were estimated using the parameterization of viscosity as a function of temperature given in specified references.

<sup>b</sup>Measurement was performed at 295 K using a rotational rheometer.

1 **Figures**

2

(a) **Side view**

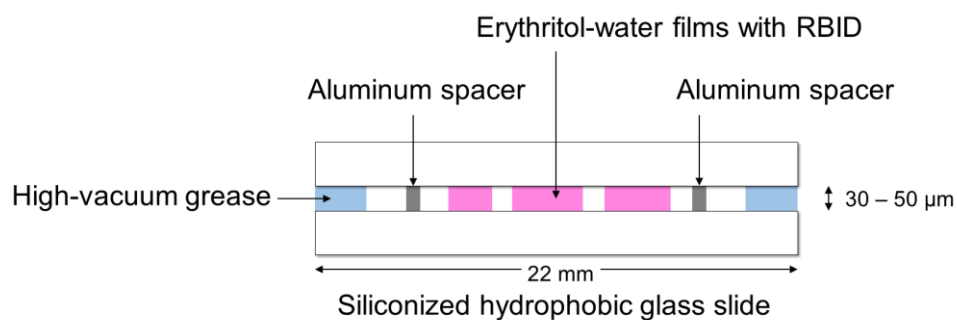

(b) **Top view**

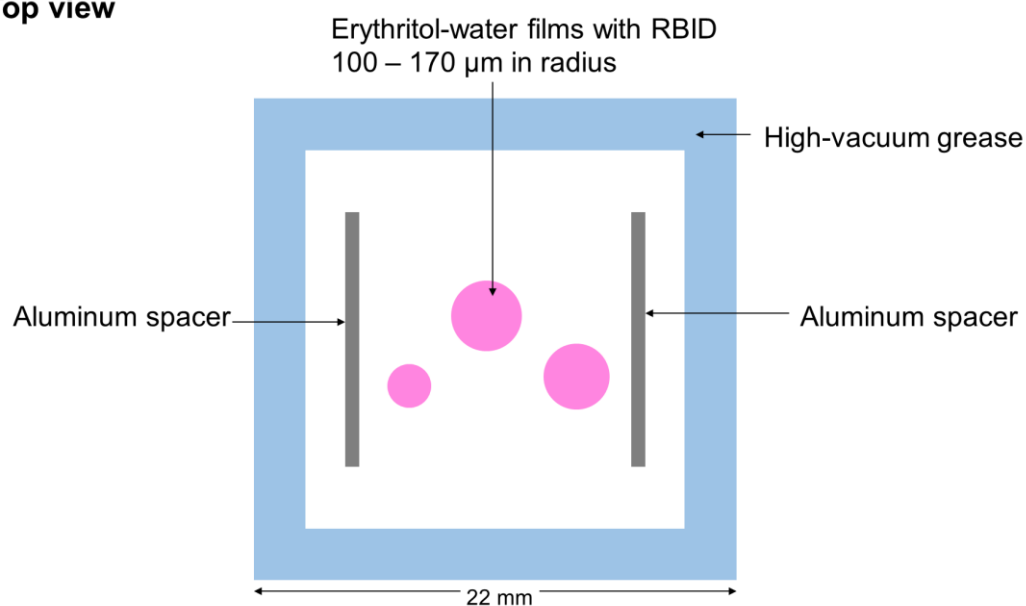

3

4 **Figure S1.** (a) Side view and (b) top view of thin films containing erythritol, water, and trace  
5 amounts of RBID as the fluorescent dye. The films were sandwiched between two siliconized  
6 hydrophobic glass slides for rFRAP experiments. A pair of aluminum spacers were placed between  
7 the slides to create films with a thickness of 30–50 μm.

8

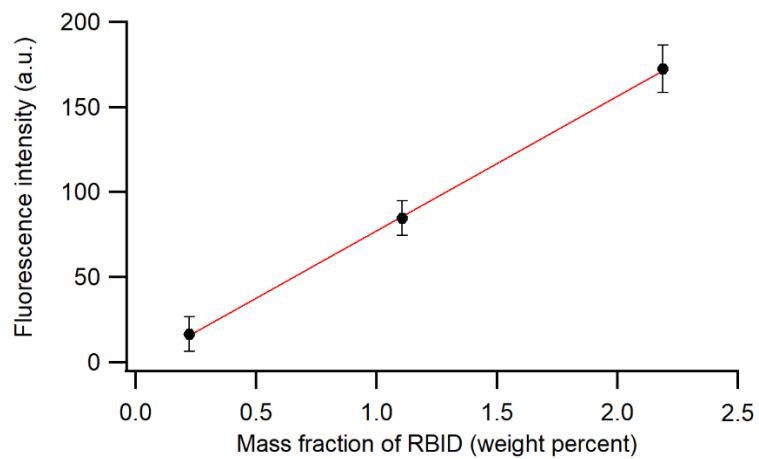

9

10 **Figure S2.** Average fluorescence intensity as a function of RBID mass fraction in sample films at  
11  $a_w = 0.630 \pm 0.025$ . The red line is a linear fit to the data. Error bars represent two standard deviations  
12 of the fluorescence intensity.

13



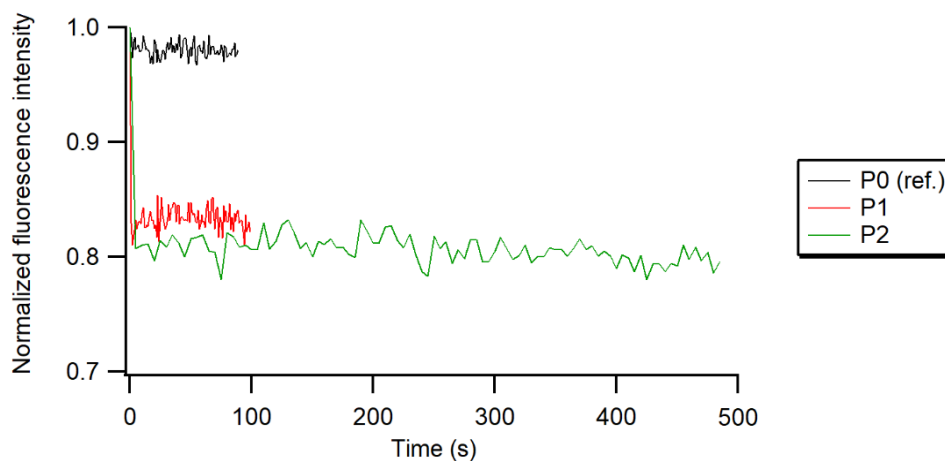

14

15 **Figure S3.** Average fluorescence intensity as a function of time following the uniform  
16 photobleaching of an entire droplet. The average fluorescence intensities after photobleaching were  
17 normalized against an image taken prior to photobleaching. The RBID mass fraction within the  
18 conditioned droplets was approximately 0.3 weight percent. P0 represents a non-photobleached  
19 reference droplet. P1 and P2 represent two droplets chosen for the experiments.

20

21 **References**

- 22 Grayson, J. W., Evoy, E., Song, M., Chu, Y., Maclean, A., Nguyen, A., Upshur, M. A., Ebrahimi,  
23 M., Chan, C. K., Geiger, F. M., Thomson, R. J. and Bertram, A. K.: The effect of hydroxyl  
24 functional groups and molar mass on the viscosity of non-crystalline organic and organic–water  
25 particles, *Atmos. Chem. Phys.*, 17(13), 8509–8524, doi:10.5194/acp-17-8509-2017, 2017.
- 26 Marshall, F. H., Miles, R. E. H., Song, Y.-C., Ohm, P. B., Power, R. M., Reid, J. P. and Dutcher,  
27 C. S.: Diffusion and reactivity in ultraviscous aerosol and the correlation with particle viscosity,  
28 *Chem. Sci.*, 7(2), 1298–1308, doi:10.1039/C5SC03223G, 2016.
- 29 Price, H. C., Murray, B. J., Mattsson, J., O’Sullivan, D., Wilson, T. W., Baustian, K. J. and  
30 Benning, L. G.: Quantifying water diffusion in high-viscosity and glassy aqueous solutions using a  
31 Raman isotope tracer method, *Atmos. Chem. Phys.*, 14(8), 3817–3830, doi:10.5194/acp-14-3817-  
32 2014, 2014.
- 33 Rothfuss, N. E. and Petters, M. D.: Influence of Functional Groups on the Viscosity of Organic  
34 Aerosol, *Environ. Sci. Technol.*, 51(1), 271–279, doi:10.1021/acs.est.6b04478, 2017.
- 35 Seinfeld, J. H. and Pandis, S. N.: *Atmospheric Chemistry and Physics: From Air Pollution to*  
36 *Climate Change*, 2nd Edition, Wiley., 2006.
- 37 Shiraiwa, M., Ammann, M., Koop, T. and Poschl, U.: Gas uptake and chemical aging of semisolid  
38 organic aerosol particles, *Proc. Natl. Acad. Sci.*, 108(27), 11003–11008,  
39 doi:10.1073/pnas.1103045108, 2011.
- 40 Song, Y. C., Haddrell, A. E., Bzdek, B. R., Reid, J. P., Bannan, T., Topping, D. O., Percival, C.  
41 and Cai, C.: Measurements and Predictions of Binary Component Aerosol Particle Viscosity, *J.*  
42 *Phys. Chem. A*, 120(41), 8123–8137, doi:10.1021/acs.jpca.6b07835, 2016.
- 43  
44  
45
